# Supplementary material for: Identification of a three-m6A related gene risk score model as a potential prognostic biomarker in clear cell renal cell carcinoma
Source: PeerJ. 2020 Mar 18;8:e8827. doi: 10.7717/peerj.8827 (PMC7085294; doi:10.7717/peerj.8827)
Supplement: Supplemental Information 7 [file peerj-08-8827-s007.xlsx]

## Sheet: 工作表1
sample No.	tumor	normal
1	20.114	23.611
2	9.725	13.417
3	15.109	13.141
4	19.733	25.152
5	7.928	13.142
6	22.701	25.109
7	18.115	19.331
8	15.141	14.446
9	17.309	19.105
10	9.605	13.106
11	19.531	18.118
12	23.524	25.534
13	17.308	15.441
14	11.407	11.936
15	16.739	22.116
16	17.705	16.927
