# Supplementary material for: Identification of a three-m6A related gene risk score model as a potential prognostic biomarker in clear cell renal cell carcinoma
Source: PeerJ. 2020 Mar 18;8:e8827. doi: 10.7717/peerj.8827 (PMC7085294; doi:10.7717/peerj.8827)
Supplement: Supplemental Information 8 [file peerj-08-8827-s008.xlsx]

## Sheet: 工作表1
sample No.	tumor	normal
1	5.124	2.741
2	4.411	3.983
3	9.223	6.152
4	3.311	4.202
5	4.55	1.446
6	7.714	5.521
7	1.556	2.442
8	6.638	3.011
9	4.983	3.567
10	10.441	3.691
11	3.384	4.01
12	3.151	4.471
13	5.084	5.542
14	8.918	4.413
15	6.217	4.471
16	9.016	7.334
